# Supplementary material for: Uniform self-rectifying resistive random-access memory based on an MXene-TiO2 Schottky junction
Source: Royal Society of Chemistry journal article supplement (doi:10.1039/d2na00281g), 2022-01-01
Supplement: d2na00281g1.pdf [file d2na00281g1.pdf]

## Supplementary Information

### Uniform self-rectifying resistive random access memory based on MXene-TiO<sub>2</sub>

#### Schottky junction

Chao Zang<sup>1,2#</sup>, Bo Li<sup>1,2#</sup>, Yun Sun<sup>1\*</sup>, Shun Feng<sup>1,3</sup>, Xin-Zhe Wang<sup>1,2</sup>, Xiaohui Wang<sup>1,2\*</sup>,

Dong-Ming Sun<sup>1,2\*</sup>

<sup>1</sup>Shenyang National Laboratory for Materials Science, Institute of Metal Research,  
Chinese Academy of Sciences, 72 Wenhua Road, Shenyang, 110016, China.

<sup>2</sup>School of Material Science and Engineering, University of Science and Technology of  
China, 72 Wenhua Road, Shenyang, 110016, China.

<sup>3</sup>School of Physical Science and Technology, ShanghaiTech University, 393  
Huaxiazhong Road, Shanghai, 200031, China.

<sup>#</sup>These authors were equal major contributors to this work.

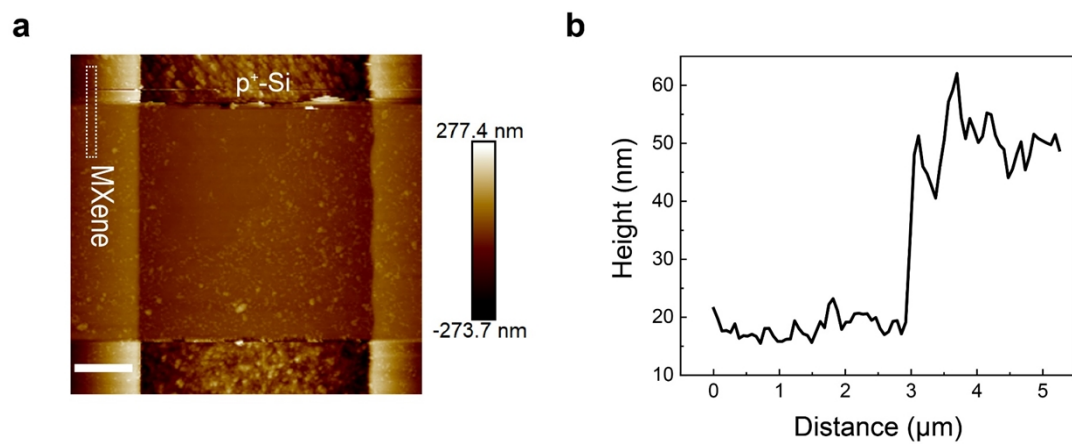

**Supplementary Fig. 1** (a) AFM image of the morphology of MXene film. Scale bar, 2  $\mu\text{m}$ . (b) Height profile along the white dashed line in (a), indicating a thickness of 25 nm MXene.

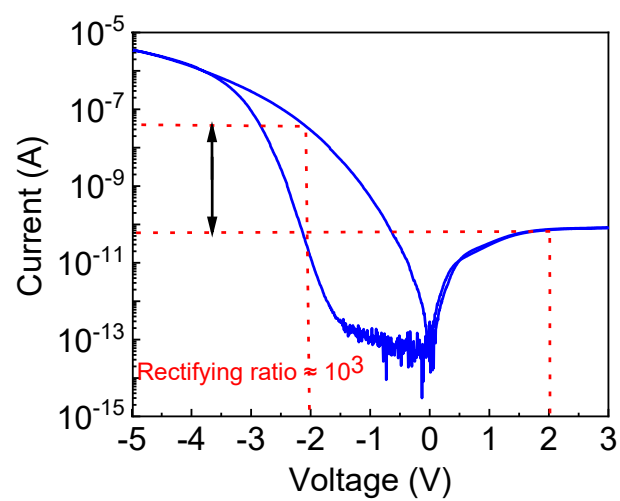

**Supplementary Fig. 2** Typical  $I$ - $V$  characteristic of an MXene-TiO<sub>2</sub>-Si RRAM with a rectifying ratio of  $10^3$  obtained at 2 V and -2 V.

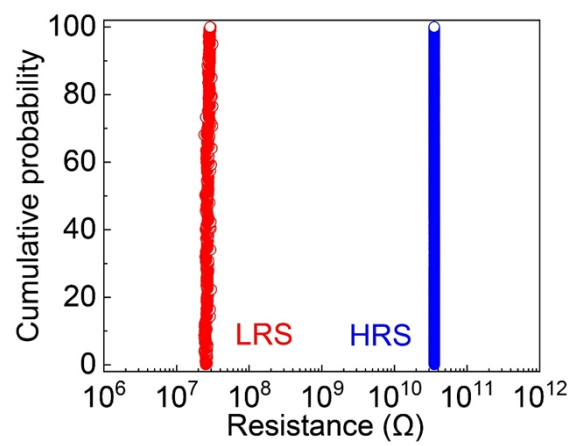

**Supplementary Fig. 3** The read disturbance under 2 V/-2 V for HRS and LRS.

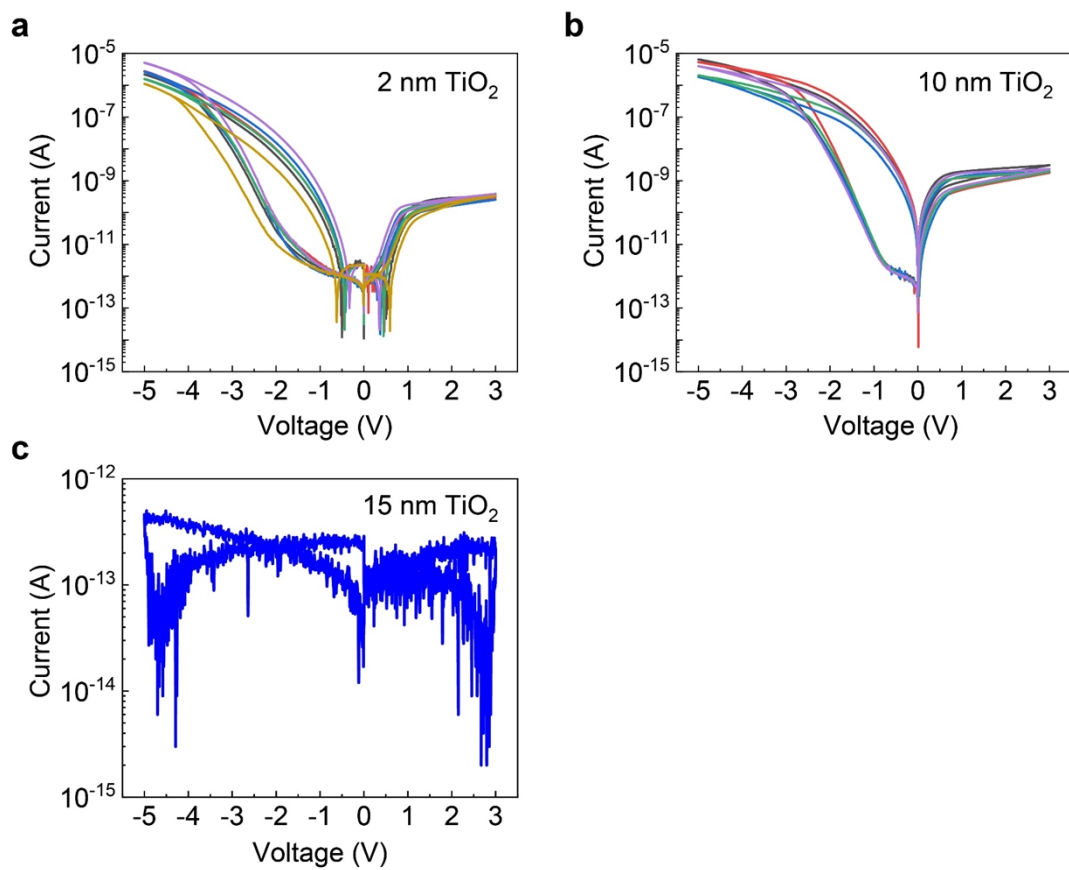

**Supplementary Fig. 4** *I-V* characteristics of MXene-TiO<sub>2</sub>-Si RRAMs with different thickness of TiO<sub>2</sub>. (a) 2 nm, (b) 10 nm, (c) 15 nm.

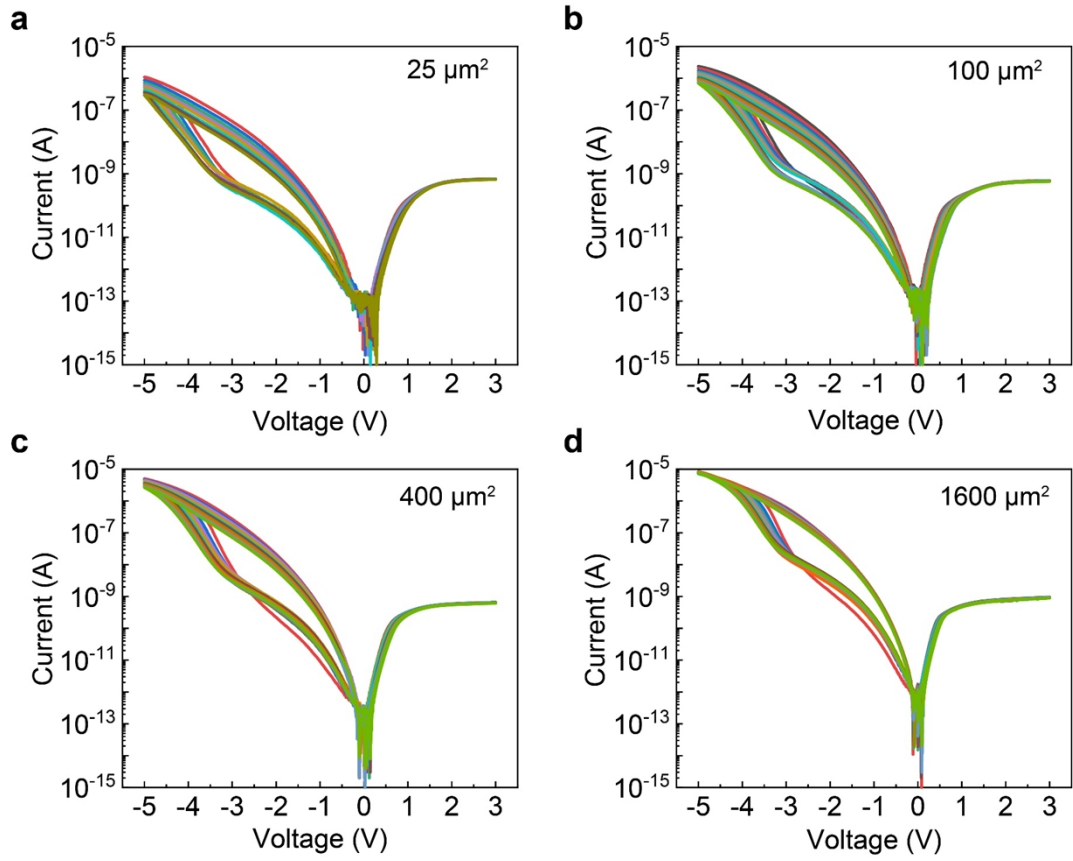

**Supplementary Fig. 5** Typical  $I$ - $V$  characteristics of MXene-TiO<sub>2</sub>-Si RRAMs with different resistive area, indicating the bipolar SET and RESET processes. (a)  $25 \mu\text{m}^2$ , (b)  $100 \mu\text{m}^2$ , (c)  $400 \mu\text{m}^2$ , (d)  $1600 \mu\text{m}^2$ .

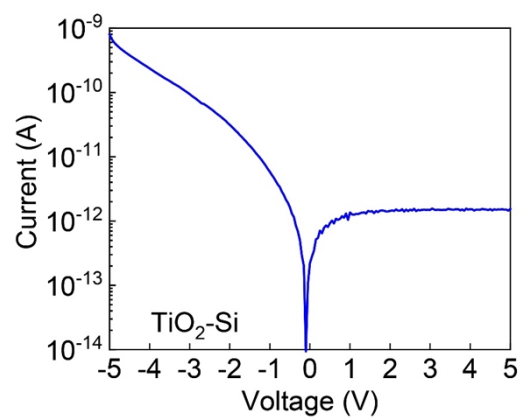

**Supplementary Fig. 6** Typical *I-V* characteristic of  $\text{TiO}_2\text{-Si}$  junction.

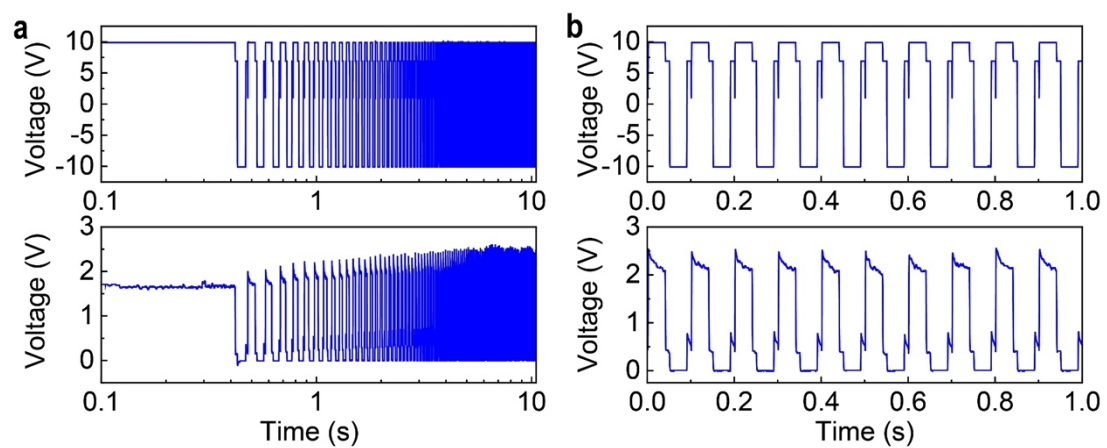

**Supplementary Fig. 7** (a) Endurance test performed with more than 100 voltage sweep cycles in 10 s. (b) About 10 cycles in 1 s cut from (a).



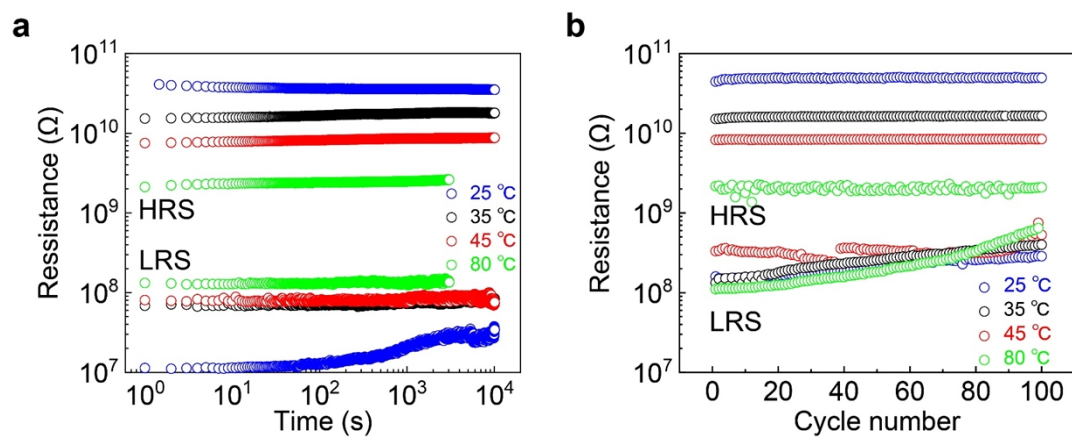

**Supplementary Fig. 8** (a) Retention and (b) endurance characteristics at the different temperatures.

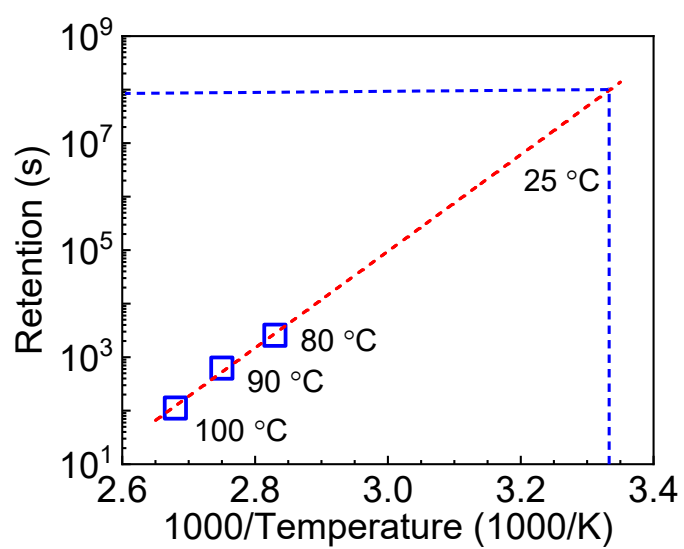

**Supplementary Fig. 9** Temperature dependence of the retention time (s) follows the Arrhenius relation. Retention time at 25 °C are extrapolated from the linear fitting of measurement results (blue squares).

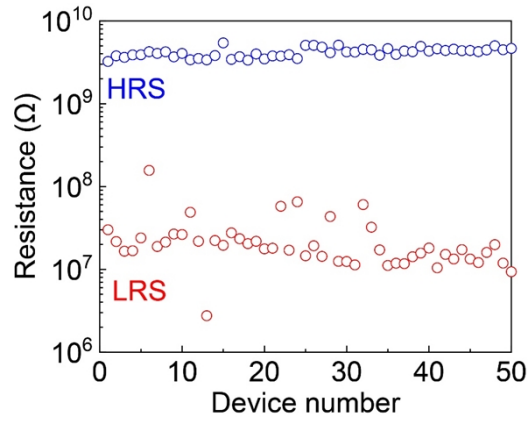

**Supplementary Fig. 10** Device-to-device variation of HRS and LRS at the read voltage of 2 V, respectively.

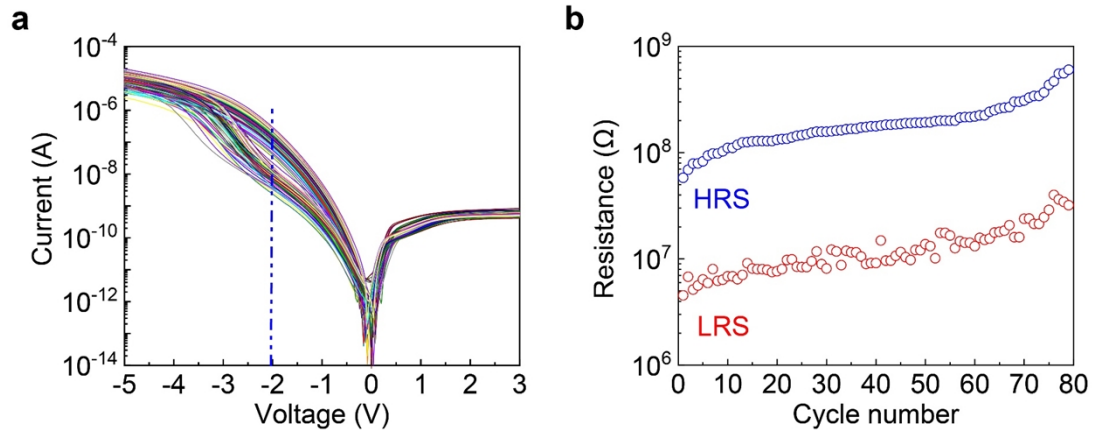

**Supplementary Fig. 11** (a) The  $I$ - $V$  characteristics of a single RRAM device with 80 cycles. (b) The extracted cycle-to-cycle distribution of HRS and LRS at 2 V read voltage. The resistance states can be also distinguished through the current on-off ratio more than 10

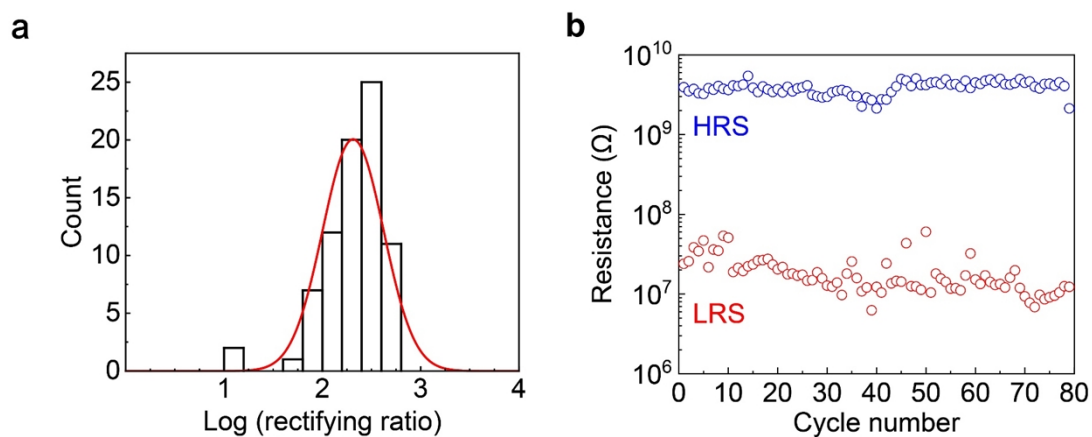

**Supplementary Fig. 12** The statistical cycle-to-cycle variation of (a) rectifying ratio performed by a logarithmic operation and (b) HRS and LRS, respectively.

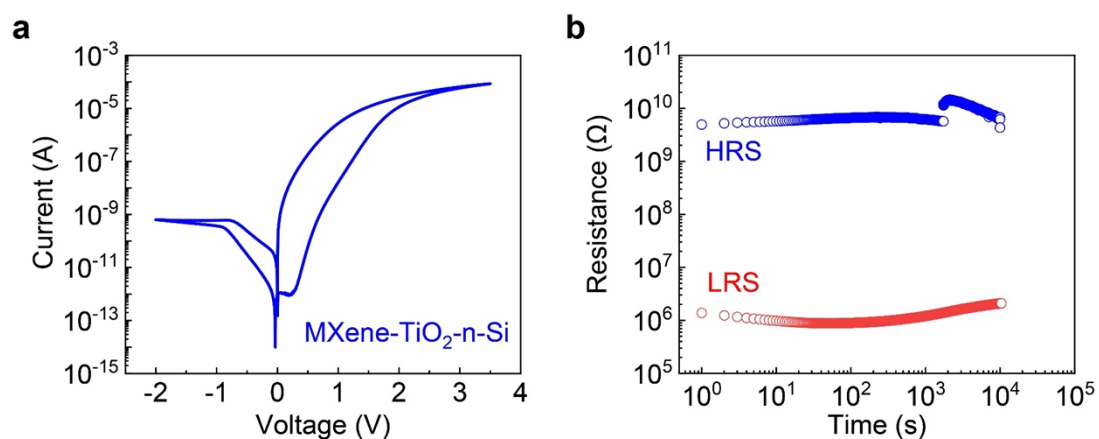

**Supplementary Fig. 13** (a) Self-rectifying behavior and (b) retention characteristics of the MXene-TiO<sub>2</sub>-n-Si.

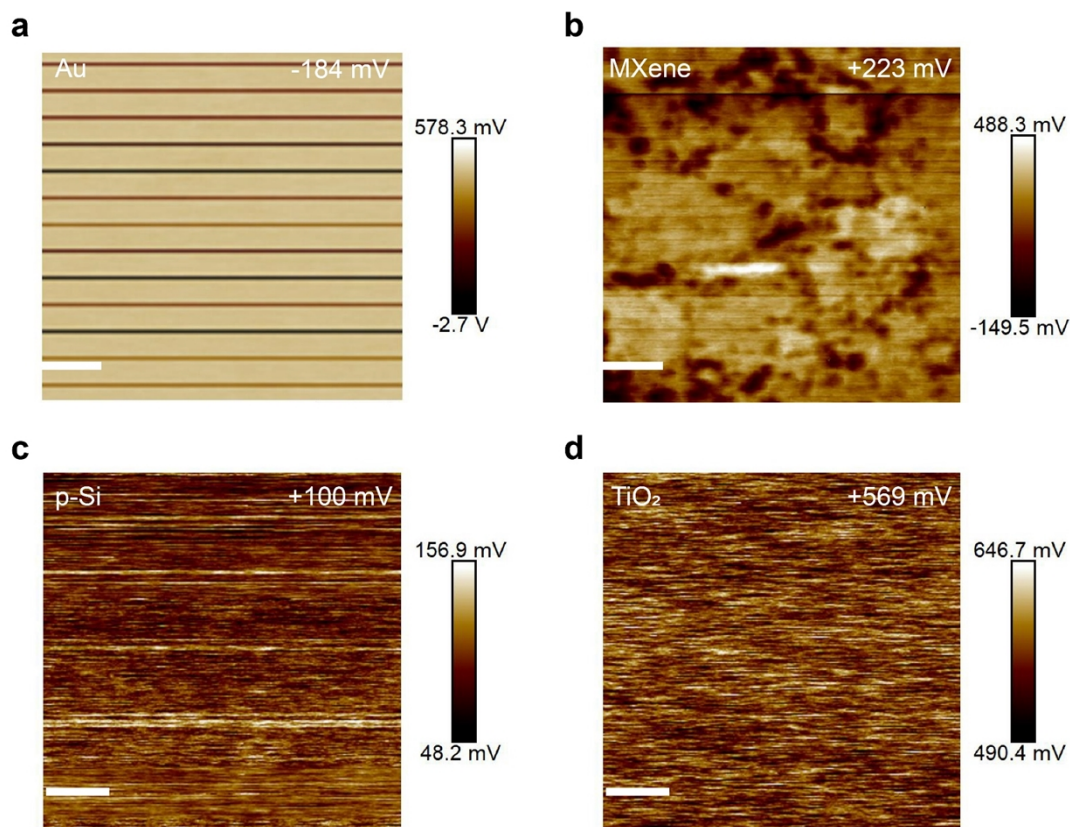

**Supplementary Fig. 14** The Kelvin probe force microscopy (KPFM) potential map images and numerical analysis of (a) Au (scale bar: 840 nm), (b) MXene (scale bar: 1  $\mu\text{m}$ ), (c)  $\text{p}^+\text{-Si}$  (scale bar: 1  $\mu\text{m}$ ) and (d)  $\text{TiO}_2$  (scale bar: 1  $\mu\text{m}$ ). The potentials of Au, MXene,  $\text{p}^+\text{-Si}$ , and  $\text{TiO}_2$  were  $-184$  mV,  $+223$  mV,  $+100$  mV and  $+569$  mV, respectively. The work function of Au is  $5.2$  eV. Therefore, the work function of MXene is  $5.2 - 0.184 - 0.223 = 4.893$  eV,  $\text{p}^+\text{-Si}$  is  $5.2 - 0.184 - 0.1 = 5.016$  eV and  $\text{TiO}_2$  is  $5.2 - 0.184 - 0.569 = 5.547$  eV. (KPFM probe: SCM-PIT-V2, 0.01-0.025 Ohm-cm Antimony (n) doped Si).

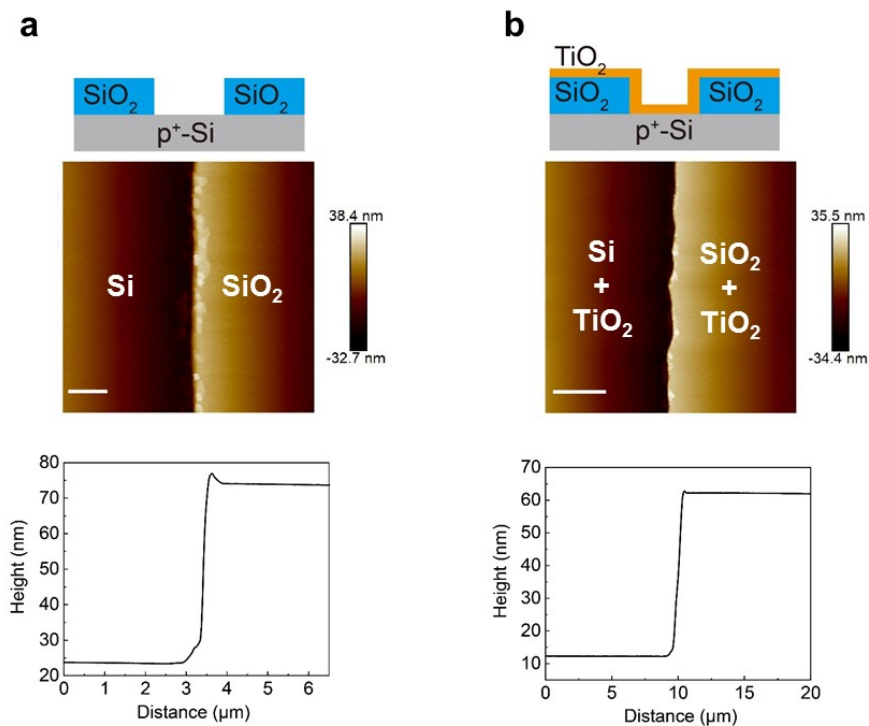

**Supplementary Fig. 15** The schematic, corresponding AFM and height of Si electrode

(a) before and (b) after 5-nm-TiO<sub>2</sub> deposited by ALD. Scale bar, 1 μm, 4 μm.

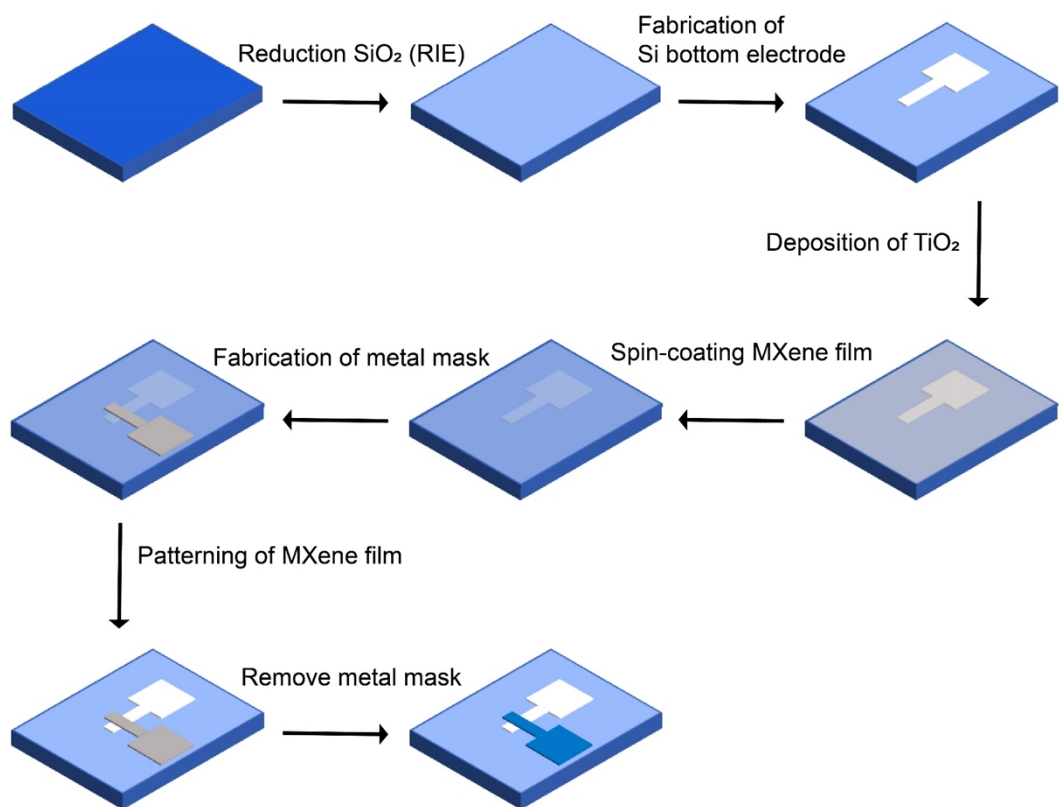

**Supplementary Fig. 16** Fabrication flowchart of MXene-TiO<sub>2</sub>-Si self-rectifying RRAMs.

Table S1. Performance comparison about TiO<sub>2</sub>-based RRAM devices.

| Structure                                                                              | on/off<br>ratio       | rectifying<br>ratio   | Retention<br>(s)      | endurance        |
|----------------------------------------------------------------------------------------|-----------------------|-----------------------|-----------------------|------------------|
| Ti/TiO <sub>2</sub> /Pt <sup>[1]</sup>                                                 | 10 <sup>3</sup>       | 10 <sup>5</sup>       |                       | 1000             |
| Cu/Ti/HfO <sub>2</sub> /TiO <sub>2</sub> /TiN <sup>[2]</sup>                           | 3 × 10 <sup>3</sup>   |                       |                       | 200              |
| TaO <sub>x</sub> /TiO <sub>2</sub> /TaO <sub>x</sub> <sup>[3]</sup>                    | 10 <sup>3</sup>       |                       | 10 <sup>4</sup>       | 10 <sup>10</sup> |
| TiN/Ti/TiO <sub>x</sub> /HfO <sub>x</sub> /TiN <sup>[4]</sup>                          | 10 <sup>3</sup>       |                       | 10 <sup>4</sup>       |                  |
| Pt/In <sub>2</sub> Sn <sub>2</sub> O <sub>3</sub> /TiO <sub>2</sub> /Pt <sup>[5]</sup> | 160                   |                       |                       | 40               |
| TiN/TiO <sub>x</sub> /Al <sub>2</sub> O <sub>3</sub> /IrO <sub>x</sub> <sup>[6]</sup>  | 10                    | 10                    | 10 <sup>5</sup>       | 1000             |
| TiN/TiO <sub>x</sub> /Al <sub>2</sub> O <sub>3</sub> /IrO <sub>x</sub> <sup>[7]</sup>  | 30                    |                       |                       | 10 <sup>6</sup>  |
| <b>My work</b>                                                                         | <b>10<sup>3</sup></b> | <b>10<sup>3</sup></b> | <b>10<sup>4</sup></b> | <b>100</b>       |

[1] Appl. Phys. Lett. 2020, 96, 262901.

[2] Advanced Electronic Materials 2020, 6 (9), 2000488□.

[3] ACS Nano 2012, 6, 9, 8166–8172.

[4] Appl. Phys. Lett. 2012, 101, 103506.

[5] Appl. Phys. Lett. 2008, 92, 162904.

[6] IEEE Transactions on Electron Devices 2018, 65 (3), 957-962□.

[7] ACS omega 2017, 2 (10), 6888-6895□.
